# Supplementary material for: Self-Assembled M2L4 Nanocapsules: Synthesis, Structure and Host-Guest Recognition Toward Square Planar Metal Complexes
Source: Materials (Basel). 2014 Jan 9;7(1):287–301. doi: 10.3390/ma7010287 (PMC5453161; doi:10.3390/ma7010287)
Supplement: Supplementary File 1 [file materials-07-00287-s001.cif]

################################################################################

data_paper

_publ_contact_author
;
Hani Amouri
;
_publ_contact_author_phone        '+33 1 44 27 30 83'
_publ_contact_author_fax          '+33 1 44 27 38 41'
_publ_contact_author_email        'hani.amouri@upmc.fr'
_publ_requested_journal           'Materials'
_publ_section_title
; 
Self-Assembled M2L4 Nanocapsules: Synthesis, Structure and Host-Guest
Recognition Toward Square Planar Metal Complexes
; 

loop_
_publ_author_name
_publ_author_address
'Christophe Desmarets'
;
Institut Parisien de Chimie Mol\'eculaire, CNRS UMR 7201, UPMC Univ Paris 06
4 place Jussieu, case 42, 75252 Paris Cedex 05, France
;
'Thierry Ducarre'
;
Institut Parisien de Chimie Mol\'eculaire, CNRS UMR 7201, UPMC Univ Paris 06
4 place Jussieu, case 42, 75252 Paris Cedex 05, France
;
'Marie-Noelle Rager'
;
NMR Services of Ecole Nationale Sup\'erieure de Chimie de Paris
11 rue Pierre et Marie Curie, 75231 Paris Cedex 05, France
;
'Geoffrey Gontard'
;
Institut Parisien de Chimie Mol\'eculaire, CNRS UMR 7201, UPMC Univ Paris 06
4 place Jussieu, case 42, 75252 Paris Cedex 05, France
;
'Hani Amouri'
;
Institut Parisien de Chimie Mol\'eculaire, CNRS UMR 7201, UPMC Univ Paris 06
4 place Jussieu, case 42, 75252 Paris Cedex 05, France
;

################################################################################

data_compound1b
 
_audit_creation_method            SHELXL-2013
_chemical_formula_moiety
'C84 H56 N8 O4 Pd2, 4(C F3 O3 S), 5(C2 H3 N), 2(C H4 O), O'
_chemical_formula_sum             'C100 H79 F12 N13 O19 Pd2 S4' 
_chemical_formula_weight          2335.80

loop_
 _atom_type_symbol
 _atom_type_description
 _atom_type_scat_dispersion_real
 _atom_type_scat_dispersion_imag
 _atom_type_scat_source
 'C'  'C'   0.0033   0.0016
 'International Tables Vol C Tables 4.2.6.8 and 6.1.1.4'
 'H'  'H'   0.0000   0.0000
 'International Tables Vol C Tables 4.2.6.8 and 6.1.1.4'
 'N'  'N'   0.0061   0.0033
 'International Tables Vol C Tables 4.2.6.8 and 6.1.1.4'
 'O'  'O'   0.0106   0.0060
 'International Tables Vol C Tables 4.2.6.8 and 6.1.1.4'
 'F'  'F'   0.0171   0.0103
 'International Tables Vol C Tables 4.2.6.8 and 6.1.1.4'
 'S'  'S'   0.1246   0.1234
 'International Tables Vol C Tables 4.2.6.8 and 6.1.1.4'
 'Pd'  'Pd'  -0.9988   1.0072
 'International Tables Vol C Tables 4.2.6.8 and 6.1.1.4'
 
_space_group_crystal_system       triclinic
_space_group_IT_number            2
_space_group_name_H-M_alt         'P -1'
_space_group_name_Hall            '-P 1'
 
_shelx_space_group_comment
;
The symmetry employed for this shelxl refinement is uniquely defined
by the following loop, which should always be used as a source of
symmetry information in preference to the above space-group names.
They are only intended as comments.
;
 
loop_
 _space_group_symop_operation_xyz
 'x, y, z'
 '-x, -y, -z'
 
_cell_length_a                    12.6470(7)
_cell_length_b                    13.1997(7)
_cell_length_c                    17.9323(9)
_cell_angle_alpha                 94.961(2)
_cell_angle_beta                  98.899(2)
_cell_angle_gamma                 106.745(2)
_cell_volume                      2804.8(3)
_cell_formula_units_Z             1
_cell_measurement_temperature     200(1)
_cell_measurement_reflns_used     9839
_cell_measurement_theta_min       2.33
_cell_measurement_theta_max       26.25
 
_exptl_crystal_description        'prism'
_exptl_crystal_colour             'colourless'
_exptl_crystal_size_max           0.2
_exptl_crystal_size_mid           0.1
_exptl_crystal_size_min           0.1
_exptl_crystal_density_method     'not measured'             
_exptl_crystal_density_diffrn     1.383          
_exptl_crystal_F_000              1186
_exptl_absorpt_coefficient_mu     0.483
_exptl_absorpt_correction_type    'multi-scan' 
_exptl_absorpt_correction_T_min   0.6796
_exptl_absorpt_correction_T_max   0.7454
_exptl_absorpt_process_details     
; 
R.H. Blessing, Acta Cryst. (1995), A51, 33-38
; 
 
_diffrn_ambient_temperature       200(1)
_diffrn_radiation_wavelength      0.71073
_diffrn_radiation_type            MoK\a
_diffrn_radiation_source          'fine-focus sealed tube'
_diffrn_radiation_monochromator   'curved graphite'
_diffrn_measurement_device_type   'Bruker APEX-II CCD'
_diffrn_measurement_method        '\f and \w scans'
_diffrn_detector_area_resol_mean  8.3333
_diffrn_reflns_number             32424
_diffrn_reflns_av_unetI/netI      0.0462
_diffrn_reflns_av_R_equivalents   0.0326
_diffrn_reflns_limit_h_min        -15
_diffrn_reflns_limit_h_max        15
_diffrn_reflns_limit_k_min        -16
_diffrn_reflns_limit_k_max        16
_diffrn_reflns_limit_l_min        -22
_diffrn_reflns_limit_l_max        18
_diffrn_reflns_theta_min          1.161
_diffrn_reflns_theta_max          26.390
_diffrn_reflns_theta_full         25.242
_diffrn_measured_fraction_theta_max   0.986
_diffrn_measured_fraction_theta_full  0.992
_diffrn_reflns_Laue_measured_fraction_max    0.986
_diffrn_reflns_Laue_measured_fraction_full   0.992
_diffrn_reflns_point_group_measured_fraction_max   0.986
_diffrn_reflns_point_group_measured_fraction_full  0.992
_reflns_number_total              11364
_reflns_number_gt                 8896
_reflns_threshold_expression      'I > 2\s(I)'
 
_reflns_special_details
;
 Reflections were merged by SHELXL according to the crystal
 class for the calculation of statistics and refinement.
;
 
_computing_data_collection        'Bruker APEX2'
_computing_cell_refinement        'Bruker SAINT'
_computing_data_reduction         'Bruker SAINT'
_computing_structure_solution     'SIR92 (Giacovazzo et al, 1993)'
_computing_structure_refinement   'SHELXL-2013 (Sheldrick, 2013)'
_computing_publication_material   'WinGX publication routines (Farrugia, 1999)'
 
_refine_ls_structure_factor_coef  Fsqd
_refine_ls_matrix_type            full
_refine_ls_weighting_scheme       calc
_refine_ls_weighting_details
'w=1/[\s^2^(Fo^2^)+(0.0977P)^2^+5.5253P] where P=(Fo^2^+2Fc^2^)/3'
_atom_sites_solution_primary      direct
_atom_sites_solution_secondary    difmap
_atom_sites_solution_hydrogens    geom
_refine_ls_hydrogen_treatment     constr
_refine_ls_extinction_method      none
_refine_ls_number_reflns          11364
_refine_ls_number_parameters      746
_refine_ls_number_restraints      0
_refine_ls_R_factor_all           0.0792
_refine_ls_R_factor_gt            0.0578
_refine_ls_wR_factor_ref          0.1823
_refine_ls_wR_factor_gt           0.1674
_refine_ls_goodness_of_fit_ref    1.076
_refine_ls_restrained_S_all       1.076
_refine_ls_shift/su_max           0.001
_refine_ls_shift/su_mean          0.000
 
loop_
 _atom_site_label
 _atom_site_type_symbol
 _atom_site_fract_x
 _atom_site_fract_y
 _atom_site_fract_z
 _atom_site_U_iso_or_equiv
 _atom_site_adp_type
 _atom_site_occupancy
 _atom_site_site_symmetry_order  
 _atom_site_calc_flag
 _atom_site_refinement_flags_posn
 _atom_site_refinement_flags_adp
 _atom_site_refinement_flags_occupancy
 _atom_site_disorder_assembly
 _atom_site_disorder_group
Pd1 Pd 0.22331(3) 0.12882(3) 0.74169(2) 0.02580(12) Uani 1 1 d . . . . .
S1 S 0.40675(11) 0.24693(10) 0.55124(7) 0.0378(3) Uani 1 1 d . . . . .
S2 S -0.1531(3) 0.0290(2) 0.91989(17) 0.0617(7) Uani 0.6 1 d . . P A 1
S3 S 0.9740(5) 0.4120(5) 0.4586(3) 0.0880(16) Uani 0.4 1 d . . P B 2
F1 F 0.4789(5) 0.0814(4) 0.5524(3) 0.1004(17) Uani 1 1 d . . . . .
F2 F 0.5218(6) 0.1734(5) 0.4642(3) 0.127(2) Uani 1 1 d . . . . .
F3 F 0.3558(6) 0.0744(4) 0.4551(3) 0.134(2) Uani 1 1 d . . . . .
F4 F -0.3738(9) -0.0324(14) 0.8939(10) 0.200(7) Uani 0.6 1 d . . P A 1
F5 F -0.3005(12) -0.0120(10) 0.7930(6) 0.175(6) Uani 0.6 1 d . . P A 1
F6 F -0.3052(9) 0.1197(7) 0.8637(6) 0.124(4) Uani 0.6 1 d . . P A 1
F7 F 0.7999(17) 0.3552(14) 0.3502(14) 0.187(10) Uani 0.4 1 d . . P B 2
F8 F 0.909(2) 0.271(2) 0.3410(14) 0.197(13) Uani 0.4 1 d . . P B 2
F9 F 0.8250(18) 0.272(2) 0.4313(13) 0.195(11) Uani 0.4 1 d . . P B 2
O1 O -0.6357(3) -0.4762(3) 0.65758(19) 0.0501(10) Uani 1 1 d . . . . .
O2 O -0.2044(3) 0.6292(3) 1.0368(2) 0.0439(9) Uani 1 1 d . . . . .
O3 O 0.5085(4) 0.3062(5) 0.6002(3) 0.0829(16) Uani 1 1 d . . . . .
O4 O 0.3203(3) 0.1945(3) 0.5904(2) 0.0557(10) Uani 1 1 d . . . . .
O5 O 0.3683(5) 0.2984(4) 0.4901(2) 0.0676(13) Uani 1 1 d . . . . .
O6 O 0.1250(5) 0.0495(4) 0.8890(3) 0.0800(15) Uani 1 1 d . . . . .
H6 H 0.1073 0.1054 0.8834 0.120 Uiso 1 1 calc R U . . .
O7 O -0.1537(7) -0.0759(5) 0.9192(5) 0.075(2) Uani 0.6 1 d . . P A 1
O8 O -0.0721(9) 0.0975(9) 0.8965(13) 0.186(9) Uani 0.6 1 d . . P A 1
O9 O -0.1583(13) 0.0751(9) 0.9930(6) 0.138(6) Uani 0.6 1 d . . P A 1
O10 O 1.0461(11) 0.3687(9) 0.4930(5) 0.167(4) Uani 0.9 1 d . . P B 2
O11 O 1.0263(17) 0.4899(19) 0.4123(14) 0.153(9) Uani 0.4 1 d . . P B 2
O12 O 0.9061(16) 0.4497(19) 0.4959(13) 0.148(8) Uani 0.4 1 d . . P B 2
N1 N 0.0905(3) 0.0193(3) 0.6723(2) 0.0286(8) Uani 1 1 d . . . . .
N2 N 0.1442(3) 0.2420(3) 0.7362(2) 0.0280(8) Uani 1 1 d . . . . .
N3 N -0.3577(3) -0.2365(3) 1.1891(2) 0.0278(8) Uani 1 1 d . . . . .
N4 N -0.3031(3) -0.0163(3) 1.2531(2) 0.0285(8) Uani 1 1 d . . . . .
N5 N 0.2265(7) 0.4834(7) 0.2368(5) 0.107(3) Uani 1 1 d . . . . .
N6 N 0.9575(15) 0.3021(16) 0.2913(10) 0.111(5) Uani 0.6 1 d . . P C 1
N8 N 0.8823(9) 0.1418(9) 0.6111(6) 0.119(3) Uani 0.9 1 d . . P . .
C1 C 0.0981(4) -0.0125(4) 0.6011(3) 0.0348(10) Uani 1 1 d . . . . .
H1 H 0.1644 0.0206 0.5826 0.042 Uiso 1 1 calc R U . . .
C2 C 0.0125(4) -0.0923(4) 0.5534(3) 0.0392(11) Uani 1 1 d . . . . .
H2 H 0.0202 -0.1134 0.5031 0.047 Uiso 1 1 calc R U . . .
C3 C -0.0836(4) -0.1407(4) 0.5794(3) 0.0369(11) Uani 1 1 d . . . . .
H3 H -0.1433 -0.1953 0.5472 0.044 Uiso 1 1 calc R U . . .
C4 C -0.0925(4) -0.1086(4) 0.6540(3) 0.0320(10) Uani 1 1 d . . . . .
C5 C -0.0029(4) -0.0276(4) 0.6985(3) 0.0316(10) Uani 1 1 d . . . . .
H5 H -0.0080 -0.0048 0.7492 0.038 Uiso 1 1 calc R U . . .
C6 C -0.1884(4) -0.1599(4) 0.6850(3) 0.0366(11) Uani 1 1 d . . . . .
C7 C -0.2676(4) -0.2077(4) 0.7086(3) 0.0376(11) Uani 1 1 d . . . . .
C8 C -0.3644(4) -0.2730(4) 0.7341(3) 0.0344(10) Uani 1 1 d . . . . .
C9 C -0.4534(4) -0.3405(4) 0.6807(2) 0.0332(10) Uani 1 1 d . . . . .
H9 H -0.4521 -0.3412 0.6278 0.040 Uiso 1 1 calc R U . . .
C10 C -0.5446(4) -0.4072(4) 0.7052(3) 0.0349(10) Uani 1 1 d . . . . .
C11 C -0.5459(4) -0.4049(4) 0.7827(3) 0.0363(11) Uani 1 1 d . . . . .
H11 H -0.6082 -0.4507 0.7992 0.044 Uiso 1 1 calc R U . . .
C12 C -0.4582(4) -0.3373(4) 0.8358(3) 0.0358(10) Uani 1 1 d . . . . .
C13 C -0.3653(4) -0.2694(4) 0.8120(3) 0.0368(11) Uani 1 1 d . . . . .
H13 H -0.3045 -0.2220 0.8483 0.044 Uiso 1 1 calc R U . . .
C14 C -0.6398(5) -0.4760(5) 0.5778(3) 0.0521(14) Uani 1 1 d . . . . .
H14A H -0.6366 -0.4045 0.5650 0.078 Uiso 1 1 calc R U . . .
H14B H -0.7099 -0.5279 0.5498 0.078 Uiso 1 1 calc R U . . .
H14C H -0.5757 -0.4952 0.5635 0.078 Uiso 1 1 calc R U . . .
C15 C -0.4594(4) -0.3339(4) 0.9164(3) 0.0399(11) Uani 1 1 d . . . . .
C16 C -0.4570(4) -0.3292(4) 0.9831(3) 0.0397(11) Uani 1 1 d . . . . .
C17 C -0.4537(4) -0.3212(4) 1.0638(2) 0.0351(10) Uani 1 1 d . . . . .
C18 C -0.5392(4) -0.3862(5) 1.0950(3) 0.0485(14) Uani 1 1 d . . . . .
H18 H -0.6013 -0.4383 1.0628 0.058 Uiso 1 1 calc R U . . .
C19 C -0.5325(5) -0.3738(5) 1.1730(3) 0.0490(14) Uani 1 1 d . . . . .
H19 H -0.5906 -0.4166 1.1949 0.059 Uiso 1 1 calc R U . . .
C20 C -0.4412(4) -0.2992(4) 1.2185(3) 0.0370(11) Uani 1 1 d . . . . .
H20 H -0.4366 -0.2915 1.2722 0.044 Uiso 1 1 calc R U . . .
C21 C -0.3640(4) -0.2475(4) 1.1133(2) 0.0294(9) Uani 1 1 d . . . . .
H21 H -0.3050 -0.2033 1.0928 0.035 Uiso 1 1 calc R U . . .
C22 C 0.1589(4) 0.3072(4) 0.6828(3) 0.0424(12) Uani 1 1 d . . . . .
H22 H 0.2036 0.2974 0.6465 0.051 Uiso 1 1 calc R U . . .
C23 C 0.1103(5) 0.3884(5) 0.6796(4) 0.0567(16) Uani 1 1 d . . . . .
H23 H 0.1210 0.4335 0.6411 0.068 Uiso 1 1 calc R U . . .
C24 C 0.0460(5) 0.4034(5) 0.7325(3) 0.0464(13) Uani 1 1 d . . . . .
H24 H 0.0131 0.4596 0.7311 0.056 Uiso 1 1 calc R U . . .
C25 C 0.0297(4) 0.3361(4) 0.7878(3) 0.0324(10) Uani 1 1 d . . . . .
C26 C 0.0816(4) 0.2560(4) 0.7882(2) 0.0302(9) Uani 1 1 d . . . . .
H26 H 0.0725 0.2101 0.8262 0.036 Uiso 1 1 calc R U . . .
C27 C -0.0338(4) 0.3501(4) 0.8445(3) 0.0358(10) Uani 1 1 d . . . . .
C28 C -0.0843(4) 0.3670(4) 0.8931(3) 0.0340(10) Uani 1 1 d . . . . .
C29 C -0.1385(4) 0.3954(4) 0.9531(2) 0.0307(9) Uani 1 1 d . . . . .
C30 C -0.1773(4) 0.3237(4) 1.0020(3) 0.0340(10) Uani 1 1 d . . . . .
H30 H -0.1717 0.2534 0.9951 0.041 Uiso 1 1 calc R U . . .
C31 C -0.2253(4) 0.3562(4) 1.0619(3) 0.0326(10) Uani 1 1 d . . . . .
C32 C -0.2336(4) 0.4585(4) 1.0714(3) 0.0326(10) Uani 1 1 d . . . . .
H32 H -0.2665 0.4799 1.1117 0.039 Uiso 1 1 calc R U . . .
C33 C -0.1937(4) 0.5306(4) 1.0218(3) 0.0313(9) Uani 1 1 d . . . . .
C34 C -0.1473(4) 0.4988(4) 0.9623(3) 0.0310(9) Uani 1 1 d . . . . .
H34 H -0.1215 0.5470 0.9279 0.037 Uiso 1 1 calc R U . . .
C35 C -0.1610(5) 0.7063(4) 0.9884(4) 0.0516(14) Uani 1 1 d . . . . .
H35A H -0.0795 0.7206 0.9941 0.077 Uiso 1 1 calc R U . . .
H35B H -0.1773 0.7728 1.0028 0.077 Uiso 1 1 calc R U . . .
H35C H -0.1966 0.6782 0.9352 0.077 Uiso 1 1 calc R U . . .
C36 C -0.2652(4) 0.2816(4) 1.1126(3) 0.0381(11) Uani 1 1 d . . . . .
C37 C -0.2958(4) 0.2177(4) 1.1539(3) 0.0395(11) Uani 1 1 d . . . . .
C38 C -0.3284(4) 0.1396(4) 1.2039(3) 0.0331(10) Uani 1 1 d . . . . .
C39 C -0.4066(5) 0.1418(4) 1.2502(3) 0.0430(12) Uani 1 1 d . . . . .
H39 H -0.4424 0.1960 1.2494 0.052 Uiso 1 1 calc R U . . .
C40 C -0.4313(5) 0.0649(4) 1.2971(3) 0.0456(13) Uani 1 1 d . . . . .
H40 H -0.4843 0.0656 1.3293 0.055 Uiso 1 1 calc R U . . .
C41 C -0.3790(4) -0.0134(4) 1.2975(3) 0.0383(11) Uani 1 1 d . . . . .
H41 H -0.3970 -0.0667 1.3299 0.046 Uiso 1 1 calc R U . . .
C42 C -0.2787(4) 0.0582(4) 1.2074(3) 0.0316(10) Uani 1 1 d . . . . .
H42 H -0.2253 0.0557 1.1759 0.038 Uiso 1 1 calc R U . . .
C43 C 0.4401(7) 0.1372(6) 0.5026(4) 0.0658(19) Uani 1 1 d . . . . .
C44 C 0.2426(7) 0.4812(7) 0.3009(5) 0.074(2) Uani 1 1 d . . . . .
C45 C 0.2613(7) 0.4748(7) 0.3801(4) 0.080(2) Uani 1 1 d . . . . .
H45A H 0.1966 0.4828 0.4011 0.120 Uiso 1 1 calc R U . . .
H45B H 0.3292 0.5319 0.4055 0.120 Uiso 1 1 calc R U . . .
H45C H 0.2709 0.4054 0.3883 0.120 Uiso 1 1 calc R U . . .
C46 C 0.0547(7) -0.0123(7) 0.9296(4) 0.088(3) Uani 1 1 d . . . . .
H46A H 0.0946 -0.0070 0.9819 0.131 Uiso 1 1 calc R U . . .
H46B H 0.0301 -0.0869 0.9056 0.131 Uiso 1 1 calc R U . . .
H46C H -0.0110 0.0126 0.9305 0.131 Uiso 1 1 calc R U . . .
C47 C -0.2831(15) 0.0324(15) 0.8636(11) 0.104(5) Uiso 0.6 1 d . . P A 1
C48 C 0.9858(10) 0.2824(11) 0.2340(9) 0.076(4) Uani 0.6 1 d . . P C 1
C49 C 1.0097(11) 0.2397(13) 0.1664(7) 0.082(4) Uani 0.6 1 d . . P C 1
H49A H 0.9532 0.1704 0.1468 0.123 Uiso 0.6 1 calc R U P C 1
H49B H 1.0844 0.2302 0.1768 0.123 Uiso 0.6 1 calc R U P C 1
H49C H 1.0082 0.2886 0.1284 0.123 Uiso 0.6 1 calc R U P C 1
C50 C 0.861(3) 0.310(3) 0.391(2) 0.121(10) Uiso 0.4 1 d . . P B 2
C51 C 0.8250(10) 0.1797(10) 0.6282(9) 0.114(4) Uani 0.9 1 d . . P . .
C52 C 0.745(2) 0.214(2) 0.6735(16) 0.286(13) Uiso 0.9 1 d . . P . .
H52A H 0.7188 0.2682 0.6494 0.429 Uiso 0.9 1 calc R U P . .
H52B H 0.7845 0.2432 0.7258 0.429 Uiso 0.9 1 calc R U P . .
H52C H 0.6804 0.1516 0.6743 0.429 Uiso 0.9 1 calc R U P . .
 
loop_
 _atom_site_aniso_label
 _atom_site_aniso_U_11
 _atom_site_aniso_U_22
 _atom_site_aniso_U_33
 _atom_site_aniso_U_23
 _atom_site_aniso_U_13
 _atom_site_aniso_U_12
Pd1 0.02807(19) 0.02555(18) 0.02169(18) 0.00346(12) 0.00876(12) 0.00279(12)
S1 0.0468(7) 0.0382(7) 0.0258(6) 0.0045(5) 0.0159(5) 0.0042(5)
S2 0.0674(17) 0.0524(15) 0.0632(17) 0.0124(13) 0.0055(13) 0.0172(13)
S3 0.074(3) 0.116(5) 0.076(3) -0.003(3) 0.007(3) 0.040(3)
F1 0.170(5) 0.112(4) 0.078(3) 0.046(3) 0.066(3) 0.103(4)
F2 0.194(6) 0.133(4) 0.115(4) 0.039(4) 0.127(5) 0.085(4)
F3 0.192(6) 0.080(3) 0.104(4) -0.053(3) -0.028(4) 0.050(4)
F4 0.070(7) 0.264(18) 0.242(17) 0.065(14) 0.014(8) 0.011(9)
F5 0.242(14) 0.184(11) 0.099(7) -0.049(7) -0.081(8) 0.141(11)
F6 0.163(9) 0.087(6) 0.137(8) -0.006(5) -0.010(7) 0.086(6)
F7 0.169(17) 0.106(12) 0.26(2) -0.045(14) -0.065(17) 0.070(12)
F8 0.22(3) 0.23(3) 0.138(18) -0.072(19) -0.084(17) 0.15(2)
F9 0.146(17) 0.35(3) 0.156(18) 0.13(2) 0.058(14) 0.13(2)
O1 0.040(2) 0.064(2) 0.0281(18) -0.0069(17) 0.0072(15) -0.0089(17)
O2 0.055(2) 0.0374(19) 0.056(2) 0.0178(16) 0.0312(18) 0.0250(17)
O3 0.060(3) 0.095(4) 0.074(3) -0.015(3) 0.011(2) 0.002(3)
O4 0.058(2) 0.055(2) 0.059(2) 0.015(2) 0.034(2) 0.012(2)
O5 0.116(4) 0.057(3) 0.041(2) 0.019(2) 0.026(2) 0.034(3)
O6 0.113(4) 0.066(3) 0.066(3) 0.022(2) 0.046(3) 0.016(3)
O7 0.073(5) 0.034(4) 0.108(7) 0.029(4) -0.002(5) 0.005(3)
O8 0.064(6) 0.077(7) 0.45(3) 0.126(12) 0.082(11) 0.022(5)
O9 0.234(15) 0.095(8) 0.083(7) -0.015(6) -0.054(8) 0.099(9)
O10 0.260(13) 0.179(10) 0.100(6) 0.045(6) 0.041(7) 0.113(10)
O11 0.127(15) 0.18(2) 0.18(2) 0.124(18) 0.049(15) 0.044(15)
O12 0.102(13) 0.19(2) 0.155(19) -0.026(16) 0.039(13) 0.052(14)
N1 0.0315(19) 0.0276(19) 0.0256(18) 0.0057(15) 0.0090(15) 0.0050(15)
N2 0.0260(18) 0.033(2) 0.0229(18) 0.0050(15) 0.0090(14) 0.0036(15)
N3 0.0284(19) 0.0317(19) 0.0218(17) 0.0029(15) 0.0093(14) 0.0046(15)
N4 0.0328(19) 0.0273(19) 0.0236(18) 0.0039(15) 0.0098(15) 0.0041(15)
N5 0.102(6) 0.131(7) 0.092(6) 0.051(5) 0.029(5) 0.028(5)
N6 0.109(11) 0.149(14) 0.078(10) 0.002(10) 0.009(9) 0.053(10)
N8 0.106(8) 0.133(9) 0.102(7) -0.008(6) 0.028(6) 0.015(7)
C1 0.036(2) 0.038(3) 0.029(2) 0.0076(19) 0.0120(19) 0.004(2)
C2 0.043(3) 0.046(3) 0.025(2) 0.002(2) 0.011(2) 0.007(2)
C3 0.036(3) 0.033(2) 0.032(2) -0.0014(19) 0.0028(19) -0.002(2)
C4 0.029(2) 0.035(2) 0.031(2) 0.0059(19) 0.0112(18) 0.0057(19)
C5 0.033(2) 0.032(2) 0.027(2) 0.0013(18) 0.0092(18) 0.0048(19)
C6 0.032(2) 0.042(3) 0.031(2) 0.005(2) 0.0070(19) 0.002(2)
C7 0.031(2) 0.048(3) 0.028(2) 0.004(2) 0.0079(19) 0.004(2)
C8 0.028(2) 0.046(3) 0.027(2) 0.006(2) 0.0110(18) 0.004(2)
C9 0.033(2) 0.044(3) 0.022(2) 0.0039(19) 0.0111(18) 0.008(2)
C10 0.028(2) 0.044(3) 0.028(2) -0.002(2) 0.0077(18) 0.004(2)
C11 0.033(2) 0.046(3) 0.028(2) 0.003(2) 0.0138(19) 0.004(2)
C12 0.033(2) 0.048(3) 0.025(2) 0.003(2) 0.0124(19) 0.007(2)
C13 0.031(2) 0.047(3) 0.026(2) 0.002(2) 0.0059(18) 0.003(2)
C14 0.054(3) 0.061(4) 0.026(2) -0.007(2) 0.004(2) 0.000(3)
C15 0.034(3) 0.052(3) 0.028(2) 0.000(2) 0.0085(19) 0.004(2)
C16 0.035(3) 0.050(3) 0.026(2) 0.000(2) 0.0083(19) 0.002(2)
C17 0.032(2) 0.046(3) 0.022(2) 0.0018(19) 0.0085(18) 0.003(2)
C18 0.039(3) 0.059(3) 0.030(3) 0.003(2) 0.007(2) -0.011(2)
C19 0.040(3) 0.058(3) 0.033(3) 0.006(2) 0.014(2) -0.013(2)
C20 0.039(3) 0.045(3) 0.021(2) 0.006(2) 0.0136(19) 0.000(2)
C21 0.030(2) 0.036(2) 0.022(2) 0.0062(18) 0.0118(17) 0.0054(18)
C22 0.042(3) 0.055(3) 0.043(3) 0.026(2) 0.027(2) 0.019(2)
C23 0.062(4) 0.074(4) 0.062(4) 0.046(3) 0.040(3) 0.038(3)
C24 0.049(3) 0.054(3) 0.052(3) 0.025(3) 0.026(3) 0.027(3)
C25 0.032(2) 0.036(2) 0.030(2) 0.0042(19) 0.0096(18) 0.0080(19)
C26 0.035(2) 0.030(2) 0.025(2) 0.0048(18) 0.0134(18) 0.0041(18)
C27 0.039(3) 0.034(3) 0.035(3) 0.006(2) 0.014(2) 0.010(2)
C28 0.037(2) 0.035(2) 0.031(2) 0.0059(19) 0.010(2) 0.010(2)
C29 0.030(2) 0.037(2) 0.026(2) 0.0042(18) 0.0100(18) 0.0079(19)
C30 0.039(3) 0.031(2) 0.036(2) 0.0081(19) 0.015(2) 0.012(2)
C31 0.031(2) 0.034(2) 0.036(2) 0.014(2) 0.0120(19) 0.0095(19)
C32 0.032(2) 0.039(3) 0.032(2) 0.009(2) 0.0139(19) 0.014(2)
C33 0.029(2) 0.032(2) 0.036(2) 0.0072(19) 0.0100(18) 0.0115(18)
C34 0.027(2) 0.038(2) 0.032(2) 0.0128(19) 0.0118(18) 0.0103(19)
C35 0.065(4) 0.039(3) 0.068(4) 0.024(3) 0.033(3) 0.027(3)
C36 0.042(3) 0.042(3) 0.040(3) 0.016(2) 0.020(2) 0.017(2)
C37 0.045(3) 0.040(3) 0.043(3) 0.013(2) 0.020(2) 0.018(2)
C38 0.040(3) 0.032(2) 0.030(2) 0.0094(19) 0.0154(19) 0.011(2)
C39 0.052(3) 0.042(3) 0.047(3) 0.011(2) 0.026(2) 0.023(2)
C40 0.053(3) 0.055(3) 0.043(3) 0.017(2) 0.033(3) 0.023(3)
C41 0.048(3) 0.036(3) 0.035(3) 0.011(2) 0.021(2) 0.010(2)
C42 0.036(2) 0.029(2) 0.032(2) 0.0069(18) 0.0162(19) 0.0071(19)
C43 0.109(6) 0.062(4) 0.043(3) 0.015(3) 0.035(4) 0.039(4)
C44 0.079(5) 0.089(5) 0.067(5) 0.032(4) 0.032(4) 0.030(4)
C45 0.091(6) 0.087(5) 0.069(5) 0.016(4) 0.031(4) 0.028(5)
C46 0.097(6) 0.091(6) 0.059(4) 0.027(4) 0.023(4) -0.005(5)
C48 0.050(7) 0.088(9) 0.080(9) 0.023(8) -0.002(6) 0.011(6)
C49 0.068(8) 0.134(12) 0.054(7) 0.035(8) 0.010(6) 0.041(8)
C51 0.070(7) 0.101(9) 0.152(12) -0.026(8) -0.010(7) 0.027(6)
 
_geom_special_details
;
 All esds (except the esd in the dihedral angle between two l.s. planes)
 are estimated using the full covariance matrix.  The cell esds are taken
 into account individually in the estimation of esds in distances, angles
 and torsion angles; correlations between esds in cell parameters are only
 used when they are defined by crystal symmetry.  An approximate (isotropic)
 treatment of cell esds is used for estimating esds involving l.s. planes.
;
 
loop_
 _geom_bond_atom_site_label_1
 _geom_bond_atom_site_label_2
 _geom_bond_distance
 _geom_bond_site_symmetry_2
 _geom_bond_publ_flag
Pd1 N4 2.023(4) 2_557 ?
Pd1 N2 2.024(4) . ?
Pd1 N3 2.025(4) 2_557 ?
Pd1 N1 2.025(4) . ?
S1 O3 1.411(5) . ?
S1 O4 1.432(4) . ?
S1 O5 1.434(4) . ?
S1 C43 1.812(7) . ?
S2 O8 1.307(11) . ?
S2 O7 1.381(7) . ?
S2 O9 1.416(12) . ?
S2 C47 1.806(18) . ?
S3 O10 1.313(11) . ?
S3 O12 1.342(18) . ?
S3 O11 1.452(18) . ?
S3 C50 1.84(4) . ?
F1 C43 1.330(8) . ?
F2 C43 1.327(8) . ?
F3 C43 1.279(9) . ?
F4 C47 1.43(2) . ?
F5 C47 1.308(19) . ?
F6 C47 1.262(18) . ?
F7 C50 1.29(4) . ?
F8 C50 1.31(4) . ?
F9 C50 1.00(4) . ?
O1 C10 1.358(6) . ?
O1 C14 1.425(6) . ?
O2 C33 1.355(6) . ?
O2 C35 1.438(6) . ?
O6 C46 1.368(8) . ?
N1 C1 1.337(6) . ?
N1 C5 1.341(6) . ?
N2 C22 1.341(6) . ?
N2 C26 1.346(5) . ?
N3 C21 1.342(5) . ?
N3 C20 1.350(6) . ?
N3 Pd1 2.025(4) 2_557 ?
N4 C42 1.333(6) . ?
N4 C41 1.344(6) . ?
N4 Pd1 2.023(4) 2_557 ?
N5 C44 1.141(10) . ?
N6 C48 1.17(2) . ?
N8 C51 1.059(13) . ?
C1 C2 1.383(7) . ?
C2 C3 1.372(7) . ?
C3 C4 1.400(7) . ?
C4 C5 1.393(6) . ?
C4 C6 1.427(6) . ?
C6 C7 1.182(7) . ?
C7 C8 1.443(6) . ?
C8 C9 1.385(6) . ?
C8 C13 1.396(6) . ?
C9 C10 1.392(6) . ?
C10 C11 1.390(6) . ?
C11 C12 1.374(7) . ?
C12 C13 1.406(6) . ?
C12 C15 1.446(6) . ?
C15 C16 1.188(7) . ?
C16 C17 1.435(6) . ?
C17 C21 1.387(6) . ?
C17 C18 1.398(7) . ?
C18 C19 1.380(7) . ?
C19 C20 1.373(7) . ?
C22 C23 1.381(8) . ?
C23 C24 1.378(7) . ?
C24 C25 1.387(7) . ?
C25 C26 1.396(7) . ?
C25 C27 1.420(6) . ?
C27 C28 1.199(7) . ?
C28 C29 1.440(6) . ?
C29 C30 1.384(6) . ?
C29 C34 1.398(6) . ?
C30 C31 1.406(6) . ?
C31 C32 1.382(7) . ?
C31 C36 1.437(6) . ?
C32 C33 1.399(6) . ?
C33 C34 1.385(6) . ?
C36 C37 1.190(7) . ?
C37 C38 1.437(6) . ?
C38 C39 1.391(7) . ?
C38 C42 1.394(6) . ?
C39 C40 1.373(7) . ?
C40 C41 1.379(7) . ?
C44 C45 1.416(11) . ?
C48 C49 1.40(2) . ?
C51 C52 1.53(3) . ?
 
loop_
 _geom_angle_atom_site_label_1
 _geom_angle_atom_site_label_2
 _geom_angle_atom_site_label_3
 _geom_angle
 _geom_angle_site_symmetry_1
 _geom_angle_site_symmetry_3
 _geom_angle_publ_flag
N4 Pd1 N2 179.65(15) 2_557 . ?
N4 Pd1 N3 90.53(15) 2_557 2_557 ?
N2 Pd1 N3 89.30(15) . 2_557 ?
N4 Pd1 N1 88.49(15) 2_557 . ?
N2 Pd1 N1 91.68(15) . . ?
N3 Pd1 N1 179.01(15) 2_557 . ?
O3 S1 O4 113.8(3) . . ?
O3 S1 O5 116.2(3) . . ?
O4 S1 O5 113.9(3) . . ?
O3 S1 C43 104.3(4) . . ?
O4 S1 C43 103.4(3) . . ?
O5 S1 C43 103.3(3) . . ?
O8 S2 O7 119.6(7) . . ?
O8 S2 O9 106.4(11) . . ?
O7 S2 O9 111.8(6) . . ?
O8 S2 C47 106.5(9) . . ?
O7 S2 C47 109.2(7) . . ?
O9 S2 C47 101.9(8) . . ?
O10 S3 O12 121.9(13) . . ?
O10 S3 O11 111.5(11) . . ?
O12 S3 O11 109.6(16) . . ?
O10 S3 C50 110.3(14) . . ?
O12 S3 C50 96.0(16) . . ?
O11 S3 C50 105.3(17) . . ?
C10 O1 C14 117.5(4) . . ?
C33 O2 C35 117.0(4) . . ?
C1 N1 C5 119.1(4) . . ?
C1 N1 Pd1 120.0(3) . . ?
C5 N1 Pd1 120.8(3) . . ?
C22 N2 C26 119.6(4) . . ?
C22 N2 Pd1 119.8(3) . . ?
C26 N2 Pd1 120.5(3) . . ?
C21 N3 C20 119.2(4) . . ?
C21 N3 Pd1 120.3(3) . 2_557 ?
C20 N3 Pd1 120.6(3) . 2_557 ?
C42 N4 C41 119.0(4) . . ?
C42 N4 Pd1 120.5(3) . 2_557 ?
C41 N4 Pd1 120.5(3) . 2_557 ?
N1 C1 C2 122.0(4) . . ?
C3 C2 C1 119.5(4) . . ?
C2 C3 C4 119.1(4) . . ?
C5 C4 C3 118.0(4) . . ?
C5 C4 C6 120.6(4) . . ?
C3 C4 C6 121.3(4) . . ?
N1 C5 C4 122.3(4) . . ?
C7 C6 C4 176.3(6) . . ?
C6 C7 C8 175.9(6) . . ?
C9 C8 C13 121.3(4) . . ?
C9 C8 C7 119.2(4) . . ?
C13 C8 C7 119.5(4) . . ?
C8 C9 C10 119.4(4) . . ?
O1 C10 C11 116.2(4) . . ?
O1 C10 C9 124.0(4) . . ?
C11 C10 C9 119.8(4) . . ?
C12 C11 C10 120.9(4) . . ?
C11 C12 C13 120.1(4) . . ?
C11 C12 C15 121.1(4) . . ?
C13 C12 C15 118.8(4) . . ?
C8 C13 C12 118.6(4) . . ?
C16 C15 C12 177.9(5) . . ?
C15 C16 C17 178.8(6) . . ?
C21 C17 C18 118.1(4) . . ?
C21 C17 C16 120.1(4) . . ?
C18 C17 C16 121.8(4) . . ?
C19 C18 C17 119.3(5) . . ?
C20 C19 C18 119.4(4) . . ?
N3 C20 C19 121.8(4) . . ?
N3 C21 C17 122.2(4) . . ?
N2 C22 C23 121.3(4) . . ?
C24 C23 C22 119.5(5) . . ?
C23 C24 C25 119.7(5) . . ?
C24 C25 C26 117.9(4) . . ?
C24 C25 C27 121.7(4) . . ?
C26 C25 C27 120.4(4) . . ?
N2 C26 C25 121.9(4) . . ?
C28 C27 C25 176.8(5) . . ?
C27 C28 C29 175.5(5) . . ?
C30 C29 C34 120.8(4) . . ?
C30 C29 C28 121.0(4) . . ?
C34 C29 C28 118.2(4) . . ?
C29 C30 C31 119.2(4) . . ?
C32 C31 C30 120.2(4) . . ?
C32 C31 C36 120.8(4) . . ?
C30 C31 C36 119.0(4) . . ?
C31 C32 C33 120.3(4) . . ?
O2 C33 C34 124.6(4) . . ?
O2 C33 C32 115.6(4) . . ?
C34 C33 C32 119.8(4) . . ?
C33 C34 C29 119.8(4) . . ?
C37 C36 C31 177.5(5) . . ?
C36 C37 C38 177.7(5) . . ?
C39 C38 C42 117.9(4) . . ?
C39 C38 C37 123.2(4) . . ?
C42 C38 C37 118.9(4) . . ?
C40 C39 C38 119.2(5) . . ?
C39 C40 C41 119.7(4) . . ?
N4 C41 C40 121.6(4) . . ?
N4 C42 C38 122.6(4) . . ?
F3 C43 F2 107.5(6) . . ?
F3 C43 F1 109.3(6) . . ?
F2 C43 F1 105.7(7) . . ?
F3 C43 S1 112.7(6) . . ?
F2 C43 S1 110.7(5) . . ?
F1 C43 S1 110.8(4) . . ?
N5 C44 C45 178.2(10) . . ?
F6 C47 F5 108.3(15) . . ?
F6 C47 F4 102.2(15) . . ?
F5 C47 F4 104.1(16) . . ?
F6 C47 S2 119.4(13) . . ?
F5 C47 S2 113.4(13) . . ?
F4 C47 S2 107.8(12) . . ?
N6 C48 C49 169.7(17) . . ?
F9 C50 F7 115(4) . . ?
F9 C50 F8 127(4) . . ?
F7 C50 F8 102(3) . . ?
F9 C50 S3 96(3) . . ?
F7 C50 S3 110(2) . . ?
F8 C50 S3 106(2) . . ?
N8 C51 C52 162(2) . . ?
 
_refine_diff_density_max    1.370
_refine_diff_density_min   -0.817
_refine_diff_density_rms    0.120
